# Supplementary material for: Terbium-149 production: a focus on yield and quality improvement towards preclinical application
Source: Springer Nature journal article supplement (doi:10.1038/s41598-024-53610-2), 2024-02-08
Supplement: MOESM1 [file 41598_2024_53610_MOESM1_ESM.pdf]

# **Terbium-149 production: a focus on yield and quality improvement towards preclinical application**

## **Supplementary information**

C. Favaretto<sup>1,2</sup>, P. V. Grundler<sup>2</sup>, Z. Talip<sup>2</sup>, U. Köster<sup>3,4</sup>, K. Johnston<sup>4</sup>, S. D. Busslinger<sup>2</sup>, P. Sprung<sup>5</sup>,  
C. C. Hillhouse<sup>6</sup>, R. Eichler<sup>6,7</sup>, R. Schibli<sup>2,8</sup>, C. Müller<sup>2,8</sup>, N. P. van der Meulen<sup>2,6\*</sup>

<sup>1</sup> Nuclear Medicine Department, Universitätsspital Basel, Basel, Switzerland

<sup>2</sup> Center for Radiopharmaceutical Sciences ETH-PSI, Paul Scherrer Institute, Villigen-PSI, Switzerland

<sup>3</sup> Institute Laue-Langevin, Grenoble, France

<sup>4</sup> Physics Department, ISOLDE/CERN, Geneva, Switzerland

<sup>5</sup> Department Hot Laboratory, Paul Scherrer Institute, Villigen-PSI, Switzerland

<sup>6</sup> Laboratory of Radiochemistry, Paul Scherrer Institute, Villigen-PSI, Switzerland

<sup>7</sup> Department of Chemistry, Biochemistry and Pharmaceutical Sciences, University of Bern, Bern, Switzerland

<sup>8</sup> Department of Chemistry and Applied Biosciences, ETH Zurich, Zurich, Switzerland

†Dedicated to the memory of Gerd-Jürgen Beyer, the “Godfather of terbium-149”

\*Corresponding Author: Dr. Nicholas P. van der Meulen

Laboratory of Radiochemistry/Center for Radiopharmaceutical Sciences

Paul Scherrer Institute

5232 Villigen-PSI

Switzerland

Tel: +41 56 310 50 87

email: [nick.vandermeulen@psi.ch](mailto:nick.vandermeulen@psi.ch)

## Supplementary Notes and Methods

### Terbium-149 coproduced isobars and pseudo-isobars

**Supplementary Table S1** Decay properties of terbium-149 and its isobars or decay products dysprosium-149, gadolinium-149 (decay product), europium-149 and europium-145 (decay product).<sup>1,2</sup>

|                                   | <b>Tb-149</b>             | <b>Dy-149</b>  | <b>Gd-149</b>  | <b>Eu-149</b> | <b>Eu-145</b> |
|-----------------------------------|---------------------------|----------------|----------------|---------------|---------------|
| <b>Half-life</b>                  | 4.1 h                     | 4.2 min        | 9.3 d          | 93.1 d        | 5.9 d         |
| <b>Main decay mode</b>            | EC + $\alpha$ + $\beta^+$ | EC + $\beta^+$ | EC + $\beta^+$ | EC            | $\beta^+$     |
| <b>E<math>\gamma</math> (keV)</b> | 352.2 (29.8)              | 100.7 (15.3)   | 149.7 (48.4)   | 327.5 (4.75)  | 893.7 (66)    |
| <b>(I<math>\gamma</math> [%])</b> | 165.0 (26.7)              | 789.4 (11.6)   | 298.6 (27.9)   | 277.1 (4.18)  | 653.5 (15.0)  |
|                                   | 388.6 (18.6)              | 1776.2 (11.7)  | 346.7 (23.7)   |               | 1658.5 (15)   |
|                                   | 652.1 (16.5)              | 653.6 (9.1)    | 748.6 (8.3)    |               | 1997.0 (7.2)  |
|                                   | 853.4 (15.7)              | 106.2 (8.30)   | 788.9 (7.3)    |               |               |
|                                   | 817.1 (11.8)              | 1805.8 (7.7)   |                |               |               |
|                                   | 861.9 (7.60)              | 253.6 (6.78)   |                |               |               |
|                                   | 464.9 (5.73)              | 775.1 (2.7)    |                |               |               |

Only the lines with I $\gamma$  > 5% are reported (except for europium-149).

**Supplementary Table S2** Decay properties of terbium-149 pseudo-isobars praseodymium-133, cerium-133 and lanthanum-133.<sup>3</sup>

|                                   | <b>Pr-133</b>  | <b>Ce-133</b>  | <b>Ce-133m</b> | <b>La-133</b>  |
|-----------------------------------|----------------|----------------|----------------|----------------|
| <b>Half-life</b>                  | 6.5 min        | 97 min         | 5.1 h          | 3.9 h          |
| <b>Main decay mode</b>            | EC + $\beta^+$ | EC + $\beta^+$ | EC + $\beta^+$ | EC + $\beta^+$ |
| <b>E<math>\gamma</math> (keV)</b> | 134.3 (100)    | 97.3 (46)      | 477.2 (39.3)   | 278.8 (2.4)    |
| <b>(I<math>\gamma</math> [%])</b> | 315.6 (88)     | 76.9 (15.9)    | 510.4 (20.8)   | 302.4 (1.6)    |
|                                   | 465.2 (62)     | 557.7 (11.4)   | 58.4 (19.3)    | 290.1 (1.4)    |
|                                   | 330.9 (51)     |                | 130.8 (18.0)   |                |
|                                   | 241.9 (42)     |                | 784.6 (9.7)    |                |
|                                   | 362.5 (13.6)   |                | 87.9 (5.2)     |                |
|                                   | 645.2 (11.8)   |                |                |                |
|                                   | 183.8 (9.6)    |                |                |                |
|                                   | 303.0 (8.0)    |                |                |                |
|                                   | 318.0 (7.4)    |                |                |                |
|                                   | 496.4 (7.4)    |                |                |                |
|                                   | 149.6 (6.4)    |                |                |                |
|                                   | 537.3 (6.1)    |                |                |                |
|                                   | 223.2 (5.4)    |                |                |                |

Only the lines with I $\gamma$  > 5% are reported (except for lanthanum-133).

### Preclinical PET/CT scan

Five-week-old female, athymic CD1 nude mice were obtained from Charles River Laboratories (Sulzfeld, Germany). After an acclimatization period of at least 7 days, mice were subcutaneously

inoculated with AR42J tumor cells, a rat pancreatic tumor cell line, ( $5 \times 10^6$  cells in 100  $\mu$ L phosphate-buffered saline (PBS)) on the right shoulder as previously reported.<sup>4</sup> PET/CT scans were acquired 10–14 days after tumor cell inoculation. [ $^{149}\text{Tb}$ ]Tb-DOTATATE (5 MBq, 0.5 nmol, prepared as described above and diluted in PBS with 0.05% bovine serum albumin) was injected into a lateral tail vein of the mouse. During the scan, the mouse was anesthetized with a mixture of isoflurane and oxygen. The scans were performed using a small-animal bench-top PET/CT scanner (G8, Perkin Elmer, Massachusetts, U.S.A.<sup>5</sup>), as previously reported,<sup>6</sup> with a set energy window ranging from 150 keV to 650 keV. Static whole-body PET scans of 10 min duration were performed at 2 h after injection of the radiopeptide, followed by a CT scan of  $\sim 1.5$  min. The acquisition reconstruction of the images was performed using the G8 PET/CT scanner software (version 2.0.0.10). All images were prepared using VivoQuant post-processing software (version 3.5, inviCRO Imaging Services and Software, Boston U.S.). A Gaussian post-reconstruction filter (full width at half maximum = 1 mm) was applied to the images and the scale adjusted by cutting 10% off the lower signal intensity.

## Supplementary Data

### Improved zinc separation achieved by introducing a column rinse step with 1 M $\text{NH}_4\text{NO}_3$

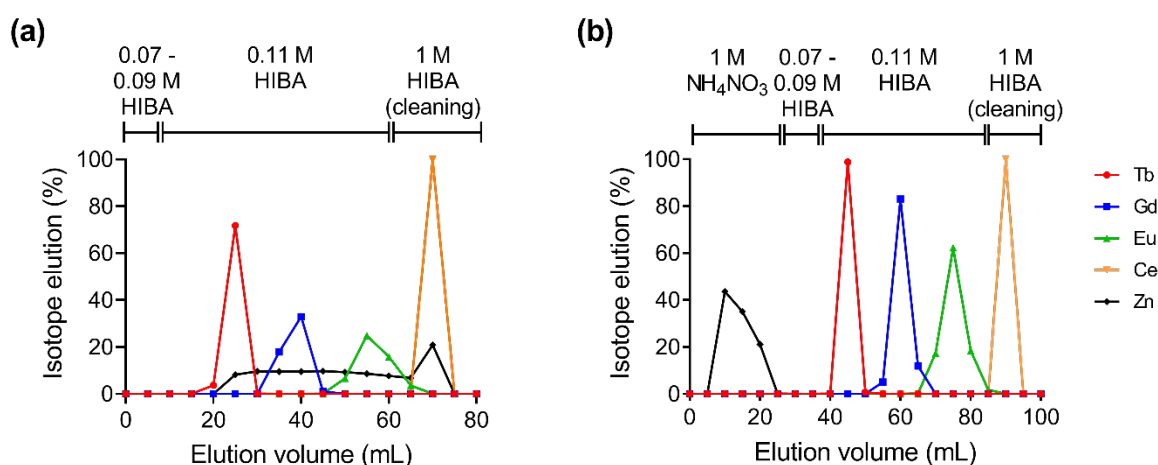

**Supplementary Figure S1** (a) Representative elution profile of zinc, terbium, gadolinium, europium and cerium from Sykam resin column (1.4 mL) by gradient elution of 0.07–1.0 M  $\alpha$ -HIBA. (b) Representative elution profile of zinc, terbium, gadolinium, europium and cerium from Sykam resin column (1.4 mL) using 20 mL 1.0 M  $\text{NH}_4\text{NO}_3$  followed by gradient elution 0.07–1.0 M  $\alpha$ -HIBA.

## Residual activity measurement on the gold foil at end of separation

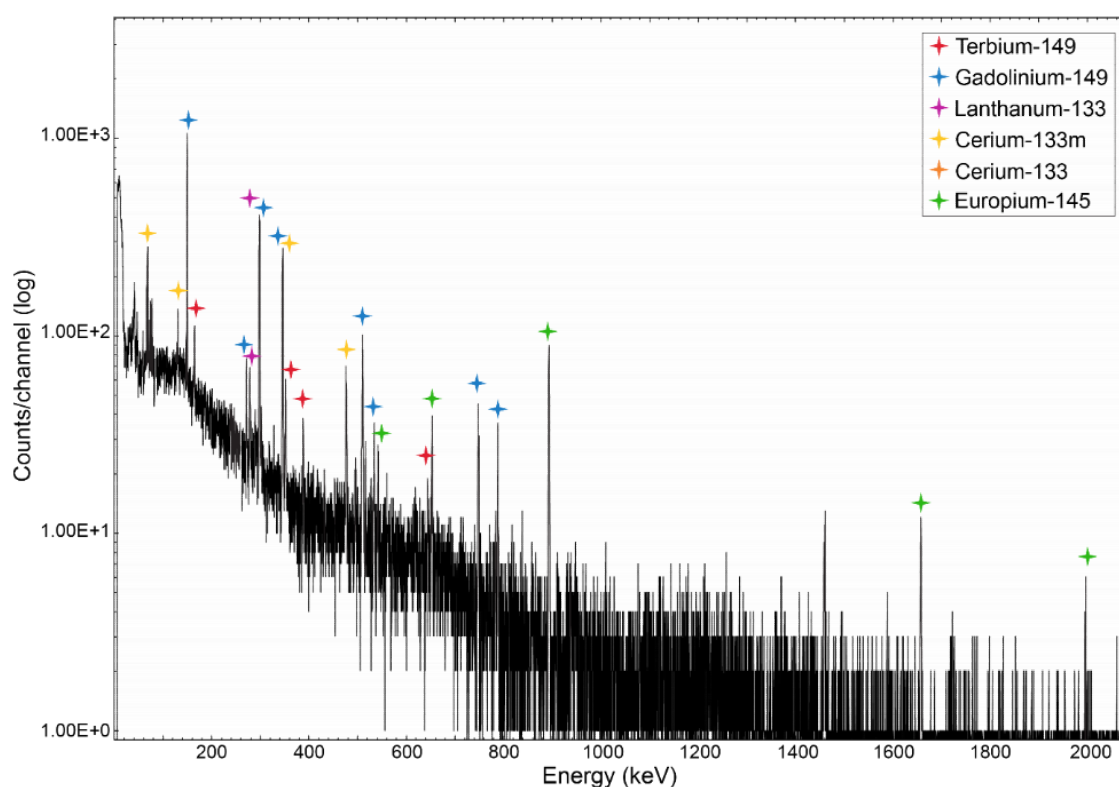

**Supplementary Figure S2**  $\gamma$ -spectrum of the gold foil after the dissolution of the Zn layer (90 min measurement time starting 22 hours after EOS; 1 m distance from the detector). Red star = terbium-149 peaks, blue star = gadolinium-149 peaks, violet star = lanthanum-133 peaks, yellow star = cerium-133m peaks, orange star = cerium-133 peaks, green star = europium-145 peaks.

## Metals quantification via ICP-MS in [ $^{149}\text{Tb}$ ]/ $\text{TbCl}_3$ samples at EOS

**Supplementary Table S3** Zinc, copper, iron and lead contents in 5 samples of [ $^{149}\text{Tb}$ ]/ $\text{TbCl}_3$  at EOS.

| Campaign      | Production     | Zinc (ppb)       | Copper (ppb)      | Iron (ppb)       | Lead (ppb)        |
|---------------|----------------|------------------|-------------------|------------------|-------------------|
| November 2021 | 2 – Fraction 1 | $120 \pm 2.5\%$  | $6.40 \pm 13.4\%$ | $449 \pm 1.9\%$  | $10.6 \pm 20.6\%$ |
|               | 2 – Fraction 2 | $263 \pm 2.1\%$  | $22.3 \pm 6.5\%$  | $184 \pm 5.7\%$  | $814 \pm 1.6\%$   |
|               | 3 – Fraction 1 | $73.0 \pm 1.9\%$ | $2.20 \pm 12.7\%$ | $31.9 \pm 5.7\%$ | $22.0 \pm 4.1\%$  |
|               | 4 – Fraction 1 | $153 \pm 2.4\%$  | < LOQ (5.7)       | $225 \pm 5.6\%$  | $422 \pm 1.8\%$   |
| March 2022    | 4 – Fraction 2 | $96.4 \pm 1.9\%$ | $6.90 \pm 6.2\%$  | $48.5 \pm 5.6\%$ | $4.87 \pm 4.9\%$  |

LOD= limit of detection

## References

1. Singh, B. & Chen, J. Nuclear Structure and Decay Data for A=149 Isobars. *Nucl. Data Sheets* **185**, 2–559 (2022).
2. Browne, E. & Tuli, J. K. Nuclear Data Sheets for A = 145. *Nucl. Data Sheets* **110**, 507–680 (2009).
3. Khazov, Y., Rodionov, A. & Kondev, F. G. Nuclear Data Sheets for A = 133. *Nucl. Data Sheets* **112**, 855–1113 (2011).
4. Borgna, F. *et al.* Simultaneous visualization of  $^{161}\text{Tb}$ -and  $^{177}\text{Lu}$ -Labeled somatostatin analogues using dual-isotope SPECT imaging. *Pharmaceutics* **13**, 1–13 (2021).
5. Gu, Z. *et al.* Performance evaluation of G8, a high-sensitivity benchtop preclinical PET/CT tomograph. *J. Nucl. Med.* **60**, 142–149 (2019).
6. Umbricht, C. A. *et al.* Alpha-PET for Prostate Cancer: Preclinical investigation using  $^{149}\text{Tb}$ -PSMA-617. *Sci. Rep.* **9**, 1–10 (2019).
